# Supplementary material
Source: PubMed Central journal article supplement (PMC9353702)
Supplement: jamaoncol-e222970-s001.pdf [file jamaoncol-e222970-s001.pdf]

## Supplemental Online Content

Sherer MV, Qiao EM, Kotha NV, Qian AS, Rose BS. Association between prostate-specific antigen screening and prostate cancer mortality among non-Hispanic Black and non-Hispanic White US veterans. *JAMA Oncol*. Published online August 4, 2022.  
doi:10.1001/jamaoncol.2022.2970

**eTable 1.** Full Model Outputs for Fine-Gray Competing Risk Regression With Nonsignificant Variables Removed From the Model

**eTable 2.** Full Model Outputs for Fine-Gray Competing Risk Regression for Patients Aged 60-69

This supplemental material has been provided by the authors to give readers additional information about their work.

**eTable 1.** Full Model Outputs for Fine-Gray Competing Risk Regression With Nonsignificant Variables Removed From the Model

SHR = subdistribution hazard ratio. CI = Confidence interval.

| Characteristic                   | Cancer-Specific Mortality sHR (95% CI) | Cancer-Specific Mortality – NHW sHR (95% CI) | Cancer-Specific Mortality – Black sHR (95% CI) |
|----------------------------------|----------------------------------------|----------------------------------------------|------------------------------------------------|
| PSA screening rate               | 0.55 (0.49-0.63)                       | 0.55 (0.47-0.64)                             | 0.57 (0.46-0.72)                               |
| Race                             |                                        |                                              |                                                |
| Non-Hispanic White               | 1.02 (0.93-1.11)                       | -                                            | -                                              |
| Non-Hispanic Black               | 1.00                                   | -                                            | -                                              |
| Age at Diagnosis                 | 1.03 (1.02-1.04)                       | 1.02 (1.01-1.04)                             | 1.05 (1.03-1.07)                               |
| Year of Diagnosis                |                                        |                                              |                                                |
| 2004-2008                        | 2.71 (2.26-3.25)                       | 2.60 (2.08-3.26)                             | 2.94 (2.15-4.03)                               |
| 2009-2012                        | 1.92 (1.60-2.31)                       | 1.93 (1.54-2.42)                             | 1.90 (1.38-2.60)                               |
| 2013-2017                        | 1.00                                   | 1.00                                         | 1.00                                           |
| Charlson Comorbidity Index Score |                                        |                                              |                                                |
| 0                                | 1.00                                   | 1.00                                         | 1.00                                           |
| 1                                | 1.14 (0.99-1.31)                       | 1.14 (0.97-1.35)                             | 1.14 (0.89-1.48)                               |
| 2+                               | 1.44 (1.33-1.57)                       | 1.36 (1.23-1.50)                             | 1.67 (1.43-1.96)                               |
| Employment status                |                                        |                                              |                                                |
| Employed                         | 1.00                                   | 1.00                                         | 1.00                                           |
| Other/Not Employed               | 1.17 (1.06-1.29)                       | 1.21 (1.07-1.36)                             | 1.08 (0.88-1.32)                               |
| Marital Status                   |                                        |                                              |                                                |
| Married                          | 1.00                                   | 1.00                                         | 1.00                                           |
| Other/Not Married                | 1.25 (1.15-1.35)                       | 1.30 (1.18-1.43)                             | 1.12 (0.96-1.30)                               |
| Tobacco use                      |                                        |                                              |                                                |
| Yes                              | 1.51 (1.37-1.68)                       | 1.53 (1.35-1.72)                             | 1.49 (1.23-1.80)                               |
| No                               | 1.00                                   | 1.00                                         | 1.00                                           |
| Unknown                          | 1.11 (0.94-1.31)                       | 1.13 (0.92-1.38)                             | 1.07 (0.80-1.43)                               |

**eTable 2.** Full Model Outputs for Fine-Gray Competing Risk Regression for Patients Aged 60-69

sHR = Subdistribution hazard ratio. CI = Confidence interval. \* = by zip code.

| Characteristic                   | Cancer-Specific Mortality sHR (95% CI) | Cancer-Specific Mortality – NHW sHR (95% CI) | Cancer-Specific Mortality – Black sHR (95% CI) |
|----------------------------------|----------------------------------------|----------------------------------------------|------------------------------------------------|
| PSA screening rate               | 0.54 (0.43-0.67)                       | 0.54 (0.41-0.72)                             | 0.54 (0.37-0.80)                               |
| PCP visit rate                   | 1.06 (0.88-1.28)                       | 1.04 (0.82-1.30)                             | 1.13 (0.82-1.57)                               |
| Race                             |                                        |                                              |                                                |
| Non-Hispanic White               | 0.98 (0.88-1.09)                       | -                                            | -                                              |
| Non-Hispanic Black               | 1.00                                   | -                                            | -                                              |
| Age at Diagnosis                 | 1.03 (1.01-1.05)                       | 1.03 (1.00-1.05)                             | 1.04 (1.01-1.08)                               |
| Year of Diagnosis                |                                        |                                              |                                                |
| 2004-2008                        | 2.61 (2.14-3.17)                       | 2.76 (2.16-3.53)                             | 2.36 (1.67-3.32)                               |
| 2009-2012                        | 1.87 (1.54-2.29)                       | 1.99 (1.56-2.54)                             | 1.67 (1.20-2.38)                               |
| 2013-2017                        | 1.00                                   | 1.00                                         | 1.00                                           |
| Charlson Comorbidity Index Score |                                        |                                              |                                                |
| 0                                | 1.00                                   | 1.00                                         | 1.00                                           |
| 1                                | 1.25 (1.07-1.46)                       | 1.25 (1.04-1.50)                             | 1.28 (0.95-1.73)                               |
| 2+                               | 1.46 (1.33-1.62)                       | 1.37 (1.22-1.54)                             | 1.76 (1.45-2.13)                               |
| Employment status                |                                        |                                              |                                                |
| Employed                         | 1.00                                   | 1.00                                         | 1.00                                           |
| Other/Not Employed               | 1.17 (1.03-1.32)                       | 1.20 (1.04-1.37)                             | 1.09 (0.84-1.39)                               |
| Marital Status                   |                                        |                                              |                                                |
| Married                          | 1.00                                   | 1.00                                         | 1.00                                           |
| Other/Not Married                | 1.18 (1.08-1.30)                       | 1.22 (1.09-1.36)                             | 1.09 (0.91-1.31)                               |
| Bachelor's degree*               |                                        |                                              |                                                |
| Top 50%                          | 0.77 (0.58-1.21)                       | 0.72 (0.46-1.22)                             | 0.84 (0.51-1.31)                               |
| Bottom 50%                       | 1.00                                   | 1.00                                         | 1.00                                           |
| Median Income*                   |                                        |                                              |                                                |
| Top 50%                          | 1.11 (0.71-1.71)                       | 1.31 (0.71-2.11)                             | 1.22 (0.77-1.98)                               |
| Bottom 50%                       | 1.00                                   | 1.00                                         | 1.00                                           |
| Tobacco use                      |                                        |                                              |                                                |
| Yes                              | 1.46 (1.30-1.64)                       | 1.44 (1.26-1.65)                             | 1.50 (1.19-1.87)                               |
| No                               | 1.00                                   | 1.00                                         | 1.00                                           |
| Unknown                          | 1.19 (0.94-1.38)                       | 1.14 (0.91-1.42)                             | 1.15 (0.82-1.62)                               |
| Agent Orange Exposure            |                                        |                                              |                                                |
| Yes                              | 0.95 (0.85-1.07)                       | 0.99 (0.87-1.12)                             | 0.82 (0.66-1.03)                               |
| No                               | 1.00                                   | 1.00                                         | 1.00                                           |
| Unknown                          | 1.09 (0.81-1.46)                       | 1.00 (0.72-1.41)                             | 1.56 (0.85-2.85)                               |
